# Supplementary material for: Increasing Fruit and Vegetable Variety over Time Is Associated with Lower 15-Year Healthcare Costs: Results from the Australian Longitudinal Study on Women’s Health
Source: MDPI journal article supplement (doi:10.3390/nu13082829), 2021-08-18
Supplement: s1 [file s1]

**Supplemental Table S1.** Modified FAVVA index.

| <b>The Modified FAVVA index: Total score = 185</b>                                                                                                                                                                                                  | <b>Scoring</b>                  | <b>Maximum score</b> |
|-----------------------------------------------------------------------------------------------------------------------------------------------------------------------------------------------------------------------------------------------------|---------------------------------|----------------------|
| <b>1 Vegetables</b>                                                                                                                                                                                                                                 |                                 |                      |
| <b>F1. How many different vegetables do you usually eat per day?</b>                                                                                                                                                                                |                                 |                      |
| <input type="radio"/> <1 per day<br><input type="radio"/> 1 per day<br><input type="radio"/> 2 per day<br><input type="radio"/> 3 per day<br><input type="radio"/> 4 per day<br><input type="radio"/> 5 per day<br><input type="radio"/> 6+ per day | 0<br>1<br>2<br>3<br>4<br>5<br>6 | 6                    |
| <b>F2. Potato boiled, mashed, baked (1 serving)</b>                                                                                                                                                                                                 |                                 |                      |
| <input type="radio"/> Never<br><input type="radio"/> Less than 1 per month<br><input type="radio"/> 1-3 per month<br><input type="radio"/> Once per week<br><input type="radio"/> 2-4 per week<br><input type="radio"/> 5 or more per week          | 0<br>1<br>2<br>3<br>4<br>5      | 5                    |
| <b>F3. Pumpkin (1 serving)</b>                                                                                                                                                                                                                      |                                 |                      |
| <input type="radio"/> Never<br><input type="radio"/> Less than 1 per month<br><input type="radio"/> 1-3 per month<br><input type="radio"/> Once per week<br><input type="radio"/> 2-4 per week<br><input type="radio"/> 5 or more per week          | 0<br>1<br>2<br>3<br>4<br>5      | 5                    |
| <b>F4. Cucumber</b>                                                                                                                                                                                                                                 |                                 |                      |
| <input type="radio"/> Never<br><input type="radio"/> Less than 1 per month<br><input type="radio"/> 1-3 per month<br><input type="radio"/> Once per week<br><input type="radio"/> 2-4 per week<br><input type="radio"/> 5 or more per week          | 0<br>1<br>2<br>3<br>4<br>5      | 5                    |
| <b>F5. Cauliflower (1 serving)</b>                                                                                                                                                                                                                  |                                 |                      |
| <input type="radio"/> Never<br><input type="radio"/> Less than 1 per month<br><input type="radio"/> 1-3 per month<br><input type="radio"/> Once per week<br><input type="radio"/> 2-4 per week<br><input type="radio"/> 5 or more per week          | 0<br>1<br>2<br>3<br>4<br>5      | 5                    |
| <b>F6. Green beans (1 serving)</b>                                                                                                                                                                                                                  |                                 |                      |
| <input type="radio"/> Never<br><input type="radio"/> Less than 1 per month<br><input type="radio"/> 1-3 per month<br><input type="radio"/> Once per week<br><input type="radio"/> 2-4 per week<br><input type="radio"/> 5 or more per week          | 0<br>1<br>2<br>3<br>4<br>5      | 5                    |
| <b>F7. Spinach (1 serving)</b>                                                                                                                                                                                                                      |                                 |                      |
| <input type="radio"/> Never<br><input type="radio"/> Less than 1 per month<br><input type="radio"/> 1-3 per month<br><input type="radio"/> Once per week<br><input type="radio"/> 2-4 per week<br><input type="radio"/> 5 or more per week          | 0<br>1<br>2<br>3<br>4<br>5      | 5                    |
| <b>F8. Cabbage or brussel sprouts (1 serving)</b>                                                                                                                                                                                                   |                                 |                      |

|                                                                                                                                                                                                                                                                                                                                               |                                      |   |
|-----------------------------------------------------------------------------------------------------------------------------------------------------------------------------------------------------------------------------------------------------------------------------------------------------------------------------------------------|--------------------------------------|---|
| <input type="radio"/> Never<br><input type="radio"/> Less than 1 per month<br><input type="radio"/> 1-3 per month<br><input type="radio"/> Once per week<br><input type="radio"/> 2-4 per week<br><input type="radio"/> 5 or more per week                                                                                                    | 0<br>1<br>2<br>3<br>4<br>5           | 5 |
| <b>F9. Peas (1 serving)</b>                                                                                                                                                                                                                                                                                                                   |                                      |   |
| <input type="radio"/> Never<br><input type="radio"/> Less than 1 per month<br><input type="radio"/> 1-3 times per month<br><input type="radio"/> Once per week<br><input type="radio"/> 2-4 times per week<br><input type="radio"/> 5-6 times per week<br><input type="radio"/> Once per day<br><input type="radio"/> 2 or more times per day | 0<br>1<br>2<br>3<br>4<br>5<br>6<br>7 | 7 |
| <b>F10. Broccoli (1 serving)</b>                                                                                                                                                                                                                                                                                                              |                                      |   |
| <input type="radio"/> Never<br><input type="radio"/> Less than 1 per month<br><input type="radio"/> 1-3 times per month<br><input type="radio"/> Once per week<br><input type="radio"/> 2-4 times per week<br><input type="radio"/> 5-6 times per week<br><input type="radio"/> Once per day<br><input type="radio"/> 2 or more times per day | 0<br>1<br>2<br>3<br>4<br>5<br>6<br>7 | 7 |
| <b>F11. Carrots (1 serving)</b>                                                                                                                                                                                                                                                                                                               |                                      |   |
| <input type="radio"/> Never<br><input type="radio"/> Less than 1 per month<br><input type="radio"/> 1-3 times per month<br><input type="radio"/> Once per week<br><input type="radio"/> 2-4 times per week<br><input type="radio"/> 5-6 times per week<br><input type="radio"/> Once per day<br><input type="radio"/> 2 or more times per day | 0<br>1<br>2<br>3<br>4<br>5<br>6<br>7 | 7 |
| <b>F12. Zucchini, eggplant, squash (1 serving)</b>                                                                                                                                                                                                                                                                                            |                                      |   |
| <input type="radio"/> Never<br><input type="radio"/> Less than 1 per month<br><input type="radio"/> 1-3 per month<br><input type="radio"/> Once per week<br><input type="radio"/> 2-4 per week<br><input type="radio"/> 5 or more per week                                                                                                    | 0<br>1<br>2<br>3<br>4<br>5           | 5 |
| <b>F13. Capsicum (1 serving)</b>                                                                                                                                                                                                                                                                                                              |                                      |   |
| <input type="radio"/> Never<br><input type="radio"/> Less than 1 per month<br><input type="radio"/> 1-3 per month<br><input type="radio"/> Once per week<br><input type="radio"/> 2-4 per week<br><input type="radio"/> 5 or more per week                                                                                                    | 0<br>1<br>2<br>3<br>4<br>5           | 5 |
| <b>F14. Mushroom (1 serving)</b>                                                                                                                                                                                                                                                                                                              |                                      |   |
| <input type="radio"/> Never<br><input type="radio"/> Less than 1 per month<br><input type="radio"/> 1-3 per month<br><input type="radio"/> Once per week<br><input type="radio"/> 2-4 per week<br><input type="radio"/> 5 or more per week                                                                                                    | 0<br>1<br>2<br>3<br>4<br>5           | 5 |
| <b>F15. Tomatoes (1 serving)</b>                                                                                                                                                                                                                                                                                                              |                                      |   |
| <input type="radio"/> Never<br><input type="radio"/> Less than 1 per month                                                                                                                                                                                                                                                                    | 0<br>1<br>2                          | 5 |

|                                                                                                                                                                                                                                                                                                                                               |                                      |   |
|-----------------------------------------------------------------------------------------------------------------------------------------------------------------------------------------------------------------------------------------------------------------------------------------------------------------------------------------------|--------------------------------------|---|
| <input type="radio"/> 1-3 per month<br><input type="radio"/> Once per week<br><input type="radio"/> 2-4 per week<br><input type="radio"/> 5 or more per week                                                                                                                                                                                  | 3<br>4<br>5                          |   |
| <b>F16. Lettuce (1 serving)</b>                                                                                                                                                                                                                                                                                                               |                                      |   |
| <input type="radio"/> Never<br><input type="radio"/> Less than 1 per month<br><input type="radio"/> 1-3 times per month<br><input type="radio"/> Once per week<br><input type="radio"/> 2-4 times per week<br><input type="radio"/> 5-6 times per week<br><input type="radio"/> Once per day<br><input type="radio"/> 2 or more times per day | 0<br>1<br>2<br>3<br>4<br>5<br>6<br>7 | 7 |
| <b>F17. Celery (1 serving)</b>                                                                                                                                                                                                                                                                                                                |                                      |   |
| <input type="radio"/> Never<br><input type="radio"/> Less than 1 per month<br><input type="radio"/> 1-3 per month<br><input type="radio"/> Once per week<br><input type="radio"/> 2-4 per week<br><input type="radio"/> 5 or more per week                                                                                                    | 0<br>1<br>2<br>3<br>4<br>5           | 5 |
| <b>F18. Avocado (1 serving)</b>                                                                                                                                                                                                                                                                                                               |                                      |   |
| <input type="radio"/> Never<br><input type="radio"/> Less than 1 per month<br><input type="radio"/> 1-3 per month<br><input type="radio"/> Once per week<br><input type="radio"/> 2-4 per week<br><input type="radio"/> 5 or more per week                                                                                                    | 0<br>1<br>2<br>3<br>4<br>5           | 5 |
| <b>F19. Onion, spring onion, leek (1 serving)</b>                                                                                                                                                                                                                                                                                             |                                      |   |
| <input type="radio"/> Never<br><input type="radio"/> Less than 1 per month<br><input type="radio"/> 1-3 per month<br><input type="radio"/> Once per week<br><input type="radio"/> 2-4 per week<br><input type="radio"/> 5 or more per week                                                                                                    | 0<br>1<br>2<br>3<br>4<br>5           | 5 |
| <b>F20. Soybeans, tofu (1 serving)</b>                                                                                                                                                                                                                                                                                                        |                                      |   |
| <input type="radio"/> Never<br><input type="radio"/> Less than 1 per month<br><input type="radio"/> 1-3 per month<br><input type="radio"/> Once per week<br><input type="radio"/> 2-4 per week<br><input type="radio"/> 5 or more per week                                                                                                    | 0<br>1<br>2<br>3<br>4<br>5           | 5 |
| <b>F21. Baked beans (1 serving)</b>                                                                                                                                                                                                                                                                                                           |                                      |   |
| <input type="radio"/> Never<br><input type="radio"/> Less than 1 per month<br><input type="radio"/> 1-3 per month<br><input type="radio"/> Once per week<br><input type="radio"/> 2-4 per week<br><input type="radio"/> 5 or more per week                                                                                                    | 0<br>1<br>2<br>3<br>4<br>5           | 5 |
| <b>F22. Other beans, lentils e.g. chick peas, split peas (1 serving)</b>                                                                                                                                                                                                                                                                      |                                      |   |
| <input type="radio"/> Never<br><input type="radio"/> Less than 1 per month<br><input type="radio"/> 1-3 per month<br><input type="radio"/> Once per week<br><input type="radio"/> 2-4 per week<br><input type="radio"/> 5 or more per week                                                                                                    | 0<br>1<br>2<br>3<br>4<br>5           | 5 |
| <b>Fruit</b>                                                                                                                                                                                                                                                                                                                                  |                                      |   |
| <b>F23. How many pieces of fruit do you eat per day (include all types)</b>                                                                                                                                                                                                                                                                   |                                      |   |

|                                                                                                                                                                                                                                                                                                                                               |                                      |   |
|-----------------------------------------------------------------------------------------------------------------------------------------------------------------------------------------------------------------------------------------------------------------------------------------------------------------------------------------------|--------------------------------------|---|
| <input type="radio"/> None<br><input type="radio"/> <1 piece per day<br><input type="radio"/> 1 piece/day<br><input type="radio"/> 2 pieces/day<br><input type="radio"/> 3 pieces per day<br><input type="radio"/> 4+ pieces per day                                                                                                          | 0<br>1<br>2<br>3<br>4<br>5           | 5 |
| <b>F24. Canned/frozen fruit eg. peaches, two fruits (1 serving)</b>                                                                                                                                                                                                                                                                           |                                      |   |
| <input type="radio"/> Never<br><input type="radio"/> Less than 1 per month<br><input type="radio"/> 1-3 per month<br><input type="radio"/> Once per week<br><input type="radio"/> 2-4 per week<br><input type="radio"/> 5 or more per week                                                                                                    | 0<br>1<br>2<br>3<br>4<br>5           | 5 |
| <b>F25. Pear (1 serving)</b>                                                                                                                                                                                                                                                                                                                  |                                      |   |
| <input type="radio"/> Never<br><input type="radio"/> Less than 1 per month<br><input type="radio"/> 1-3 per month<br><input type="radio"/> Once per week<br><input type="radio"/> 2-4 per week<br><input type="radio"/> 5 or more per week                                                                                                    | 0<br>1<br>2<br>3<br>4<br>5           | 5 |
| <b>F26. Apricot (1 serving)</b>                                                                                                                                                                                                                                                                                                               |                                      |   |
| <input type="radio"/> Never<br><input type="radio"/> Less than 1 per month<br><input type="radio"/> 1-3 per month<br><input type="radio"/> Once per week<br><input type="radio"/> 2-4 per week<br><input type="radio"/> 5 or more per week                                                                                                    | 0<br>1<br>2<br>3<br>4<br>5           | 5 |
| <b>F27. Apple (1 serving)</b>                                                                                                                                                                                                                                                                                                                 |                                      |   |
| <input type="radio"/> Never<br><input type="radio"/> Less than 1 per month<br><input type="radio"/> 1-3 times per month<br><input type="radio"/> Once per week<br><input type="radio"/> 2-4 times per week<br><input type="radio"/> 5-6 times per week<br><input type="radio"/> Once per day<br><input type="radio"/> 2 or more times per day | 0<br>1<br>2<br>3<br>4<br>5<br>6<br>7 | 7 |
| <b>F28. Orange, mandarin, grapefruit (1 serving)</b>                                                                                                                                                                                                                                                                                          |                                      |   |
| <input type="radio"/> Never<br><input type="radio"/> Less than 1 per month<br><input type="radio"/> 1-3 times per month<br><input type="radio"/> Once per week<br><input type="radio"/> 2-4 times per week<br><input type="radio"/> 5-6 times per week<br><input type="radio"/> Once per day<br><input type="radio"/> 2 or more times per day | 0<br>1<br>2<br>3<br>4<br>5<br>6<br>7 | 7 |
| <b>F29. Banana (1 serving)</b>                                                                                                                                                                                                                                                                                                                |                                      |   |
| <input type="radio"/> Never<br><input type="radio"/> Less than 1 per month<br><input type="radio"/> 1-3 times per month<br><input type="radio"/> Once per week<br><input type="radio"/> 2-4 times per week<br><input type="radio"/> 5-6 times per week<br><input type="radio"/> Once per day<br><input type="radio"/> 2 or more times per day | 0<br>1<br>2<br>3<br>4<br>5<br>6<br>7 | 7 |
| <b>F30. Peach, nectarine, plum or apricot (1 serving)</b>                                                                                                                                                                                                                                                                                     |                                      |   |
| <input type="radio"/> Never<br><input type="radio"/> Less than 1 per month<br><input type="radio"/> 1-3 per month<br><input type="radio"/> Once per week                                                                                                                                                                                      | 0<br>1<br>2<br>3                     | 5 |

|                                                         |                      |            |
|---------------------------------------------------------|----------------------|------------|
| <input type="radio"/> 2-4 per week                      | 4                    |            |
| <input type="radio"/> 5 or more per week                | 5                    |            |
| <b>F31. Mango or paw-paw (1 serving)</b>                |                      |            |
| <input type="radio"/> Never                             | 0                    | 5          |
| <input type="radio"/> Less than 1 per month             | 1                    |            |
| <input type="radio"/> 1-3 per month                     | 2                    |            |
| <input type="radio"/> Once per week                     | 3                    |            |
| <input type="radio"/> 2-4 per week                      | 4                    |            |
| <input type="radio"/> 5 or more per week                | 5                    |            |
| <b>F32. Pineapple (1 serving)</b>                       |                      |            |
| <input type="radio"/> Never                             | 0                    | 5          |
| <input type="radio"/> Less than 1 per month             | 1                    |            |
| <input type="radio"/> 1-3 per month                     | 2                    |            |
| <input type="radio"/> Once per week                     | 3                    |            |
| <input type="radio"/> 2-4 per week                      | 4                    |            |
| <input type="radio"/> 5 or more per week                | 5                    |            |
| <b>F33. Strawberries (1 serving)</b>                    |                      |            |
| <input type="radio"/> Never                             | 0                    | 5          |
| <input type="radio"/> Less than 1 per month             | 1                    |            |
| <input type="radio"/> 1-3 per month                     | 2                    |            |
| <input type="radio"/> Once per week                     | 3                    |            |
| <input type="radio"/> 2-4 per week                      | 4                    |            |
| <input type="radio"/> 5 or more per week                | 5                    |            |
| <b>F34. Melon eg. watermelon, rockmelon (1 serving)</b> |                      |            |
| <input type="radio"/> Never                             | 0                    | 5          |
| <input type="radio"/> Less than 1 per month             | 1                    |            |
| <input type="radio"/> 1-3 per month                     | 2                    |            |
| <input type="radio"/> Once per week                     | 3                    |            |
| <input type="radio"/> 2-4 per week                      | 4                    |            |
| <input type="radio"/> 5 or more per week                | 5                    |            |
|                                                         | <b>Maximum score</b> | <b>185</b> |

**Supplemental Table S2.** Differences in methods used to calculate the FAVVA index derived from the AES FFQ and the DQESv2 FFQ.

|                                   | Ashton et al 2018                                    | Current study                                      |
|-----------------------------------|------------------------------------------------------|----------------------------------------------------|
| FAVVA Item                        | AES item                                             | DQESv2 item                                        |
| Overall vegetable intake          | Times per week vegetables consumed with evening meal | Number of different vegetables consumed per day    |
| Sweet potato                      | Never – 5+ per week                                  | <i>Not assessed</i>                                |
| Corn                              | Never – 5+ per week                                  | <i>Not assessed</i>                                |
| Celery, cucumber                  | Assessed together                                    | Assessed separately (Celery; Cucumber)             |
| Overall fruit intake              | 8-point scale from None to 4+ per day                | 6-point scale from None to 4+ per day              |
| Fruit salad                       | Never – 5+ per week                                  | <i>Not assessed</i>                                |
| Dried fruit                       | Never – 5+ per week                                  | <i>Not assessed</i>                                |
| Apple, pear                       | Assessed together                                    | Assessed separately (Apples; Pears)                |
| Peach, nectarine, plum, apricot   | Assessed together                                    | Assessed separately (Apricots; Peaches/nectarines) |
| Grapes, strawberries, blueberries | Assessed together                                    | Assessed as Strawberries only                      |
| <b>Maximum score</b>              | 190                                                  | 185                                                |

Abbreviations: AES, Australian Eating Survey; DQESv2, Dietary Questionnaire for Epidemiological Studies version 2; FAVVA, Fruit and Vegetable Variety index; FFQ, Food Frequency Questionnaire

**Supplemental Table S3.**

Coefficients and 95% confidence intervals per 100-gram baseline fruit and vegetable intake (g/day) as a predictor of 15-year (2001-2015) cumulative Medicare claims and costs (\$AUD) for Australian women born 1946-51, by baseline BMI category ( $n=8833$ ).

| 2001 Fruit and vegetable intake   | Medicare variable           | Healthy weight<br>$n=3743$     | Overweight/obese<br>$n=4971$ | All<br>$n=8833$             |
|-----------------------------------|-----------------------------|--------------------------------|------------------------------|-----------------------------|
| <b>Fruit and Vegetable intake</b> | Claims ( $n$ ) <sup>a</sup> | -1.9 (-4.9, 1.0)               | <b>5.1 (2.1, 8.2)*</b>       | <b>2.9 (0.7, 5.0)*</b>      |
|                                   | Charge (\$) <sup>b</sup>    | -170.0 (-390.2, 50.2)          | <b>323.5 (106.4, 540.6)*</b> | <b>159.3 (3.8, 314.7)*</b>  |
|                                   | Benefit (\$) <sup>c</sup>   | -124.4 (-285.0, 36.3)          | <b>269.1 (109.8, 428.4)*</b> | <b>139.0 (24.8, 253.2)*</b> |
|                                   | Gap (\$) <sup>d</sup>       | -45.6 (-122.3, 31.0)           | 54.4 (-21.4, 130.2)          | 20.3 (-33.6, 74.1)          |
| <b>Fruit intake</b>               | Claims ( $n$ )              | -3.0 (-6.9, 0.8)               | <b>7.2 (3.4, 11.1)*</b>      | <b>3.7 (0.9, 6.4)*</b>      |
|                                   | Charge (\$) <sup>b</sup>    | -167.7 (-455.4, 120.0)         | <b>477.5 (200.1, 754.9)*</b> | <b>253.6 (52.9, 454.4)*</b> |
|                                   | Benefit (\$) <sup>c</sup>   | -155.0 (-364.9, 54.9)          | <b>387.5 (184.0, 591.1)*</b> | <b>197.2 (49.7, 344.7)*</b> |
|                                   | Gap (\$) <sup>d</sup>       | -12.7 (-112.9, 87.4)           | 89.9 (-6.9, 186.8)           | 56.4 (-13.1, 126.0)         |
| <b>Vegetable intake</b>           | Claims ( $n$ )              | -0.8 (-7.5, 5.9)               | 3.6 (-3.2, 10.5)             | 3.3 (-1.5, 8.2)             |
|                                   | Charge (\$) <sup>b</sup>    | -368.3 (-867.4, 130.7)         | 157.5 (-331.3, 646.4)        | 36.7 (-314.2, 387.5)        |
|                                   | Benefit (\$) <sup>c</sup>   | -172.2 (-536.4, 191.9)         | 161.0 (-197.8, 519.8)        | 105.8 (-152.0, 363.6)       |
|                                   | Gap (\$) <sup>d</sup>       | <b>-196.1 (-369.7, -22.5)*</b> | -3.5 (-174.1, 167.1)         | -69.1 (-190.6, 52.4)        |

\* $p<0.05$ ; linear regression modelling with adjustment for area of residence, ability to manage on current income and total energy intake.

Abbreviations: BMI, body mass index; FAVVA, Fruit and Vegetable Variety index

Note: Women with 'Underweight' BMI were excluded from analysis due to small sample size ( $n=113$ ).

<sup>a</sup> Number of healthcare services received under the Medicare Benefits Schedule

<sup>b</sup> Total cost of services (as charged by healthcare provider)

<sup>c</sup> Amount paid back to the patient by Medicare

<sup>d</sup> Out-of-pocket costs paid by the patient

**Supplemental Table S4.**

Coefficients and 95% confidence intervals (CI) per 100-gram change in daily fruit and vegetable intake (2001-2013) as a predictor of 15-year (2001-2015) cumulative Medicare claims and costs (\$AUD) for Australian women born 1946-51, by BMI category ( $n=6955$ ).

| Change in intake 2001-2013        | Medicare variable           | Healthy weight<br>$n=3007$ | Overweight/obese<br>$n=3857$ | All<br>$n=6955$            |
|-----------------------------------|-----------------------------|----------------------------|------------------------------|----------------------------|
| <b>Fruit and Vegetable intake</b> | Claims ( $n$ ) <sup>a</sup> | -3.0 (-7.1, 1.1)           | -7.7 (-11.7, -3.7)*          | -6.5 (-9.4, -3.6)*         |
|                                   | Charge (\$) <sup>b</sup>    | -114.0 (-424.8, 196.8)     | -650.4 (-946.7, -354.1)*     | -480.0 (-694.7, -265.2)*   |
|                                   | Benefit (\$) <sup>c</sup>   | -157.7 (-383.1, 67.7)      | -458.1 (-673.5, -242.8)*     | -374.2 (-530.7, -217.7)*   |
|                                   | Gap (\$) <sup>d</sup>       | 43.7 (-65.7, 153.0)        | -192.3 (-297.0, -87.5)*      | -105.8 (-181.1, -30.5)*    |
| <b>Fruit intake</b>               | Claims                      | -1.1 (-6.2, 4.0)           | -5.2 (-10.3, -0.07)*         | -4.4 (-8.1, -0.7)*         |
|                                   | Charge                      | -15.6 (-403.6, 372.3)      | -547.5 (-926.4, -168.5)*     | -393.3 (-665.4, -121.3)*   |
|                                   | Benefit                     | -64.5 (-345.9, 216.9)      | -358.4 (-633.8, -82.9)*      | -288.4 (-486.7, -90.1)*    |
|                                   | Gap                         | 7.0 (-73.0, 207.0)         | -201.7 (-341.2, -62.0)*      | -105.0 (-200.3, -9.6)*     |
| <b>Vegetable intake</b>           | Claims                      | -10.6 (-19.4, -1.9)*       | -20.1 (-28.8, -11.5)*        | -16.7 (-23.0, -10.5)*      |
|                                   | Charge                      | -477.9 (-1142.0, 186.2)    | -1404.1 (-2047.1, -761.1)*   | -1046.1 (-1508.5, -583.7)* |
|                                   | Benefit                     | -540.3 (-1021.9, -58.7)*   | -1062.1 (-1529.5, -594.7)*   | -872.0 (-1208.9, -535.0)*  |
|                                   | Gap                         | 62.4 (-171.3, 296.0)       | -342.0 (-569.2, -114.8)*     | -174.1 (-336.2, -12.0)*    |

\* $p < 0.05$ ; linear regression modelling with adjustment for area of residence, ability to manage on current income, total energy intake and baseline fruit and vegetable consumption.

Abbreviations: BMI, body mass index; FAVVA, Fruit and Vegetable Variety index.

Note: Women with 'Underweight' BMI were excluded from analysis due to small sample size ( $n=91$ ).

<sup>a</sup> Number of healthcare services received under the Medicare Benefits Schedule

<sup>b</sup> Total cost of services (as charged by healthcare provider)

<sup>c</sup> Amount paid back to the patient by Medicare

<sup>d</sup> Out-of-pocket costs paid by the patient
